# Supplementary material for: RETRACTED ARTICLE: Involvement of autophagy in hypoxia-BNIP3 signaling to promote epidermal keratinocyte migration
Source: PubMed Central journal article supplement (PMC6408485; doi:10.1038/s41419-019-1473-9), 2019-03-08

**A**

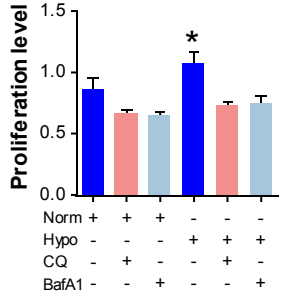

**B**

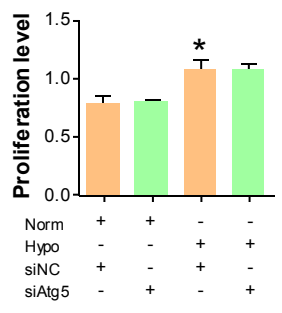

**C**

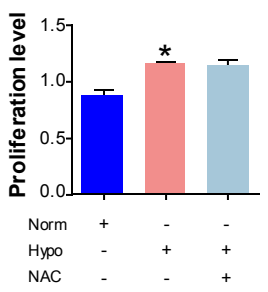

**D**

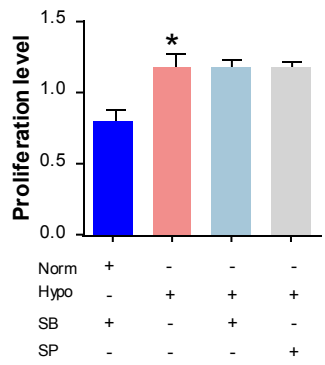

**A**

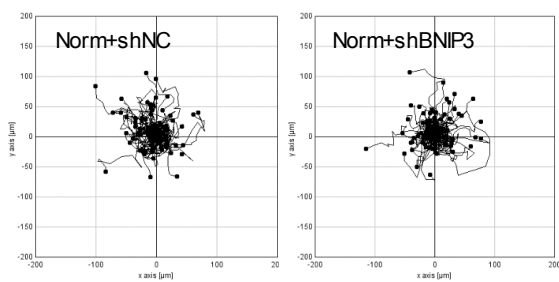

**B**

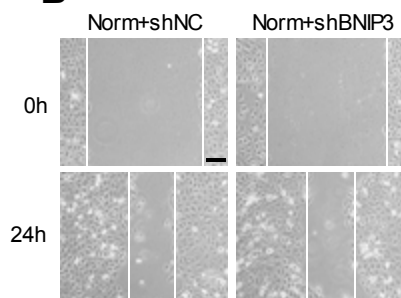

**C**

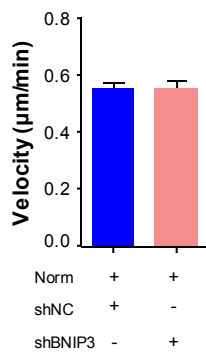

**D**

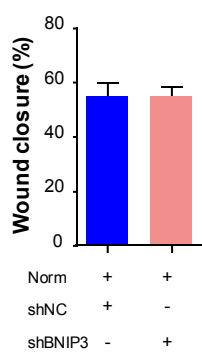

**E**

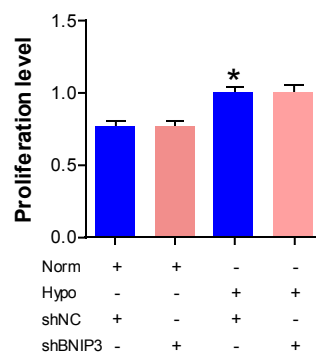

**A**

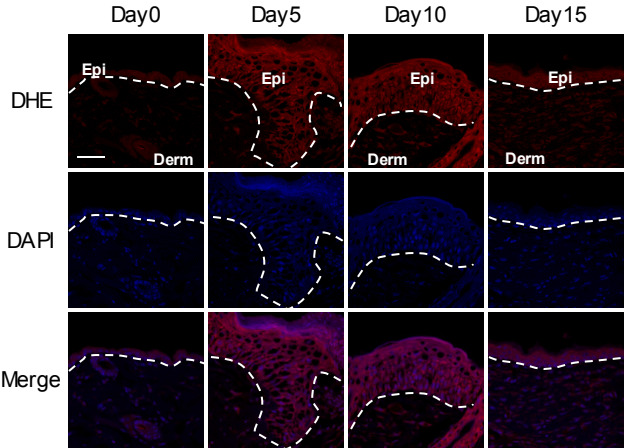

**B**

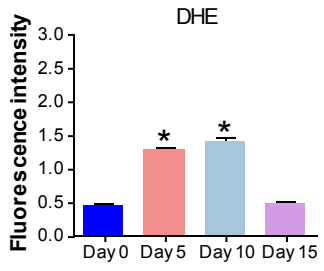

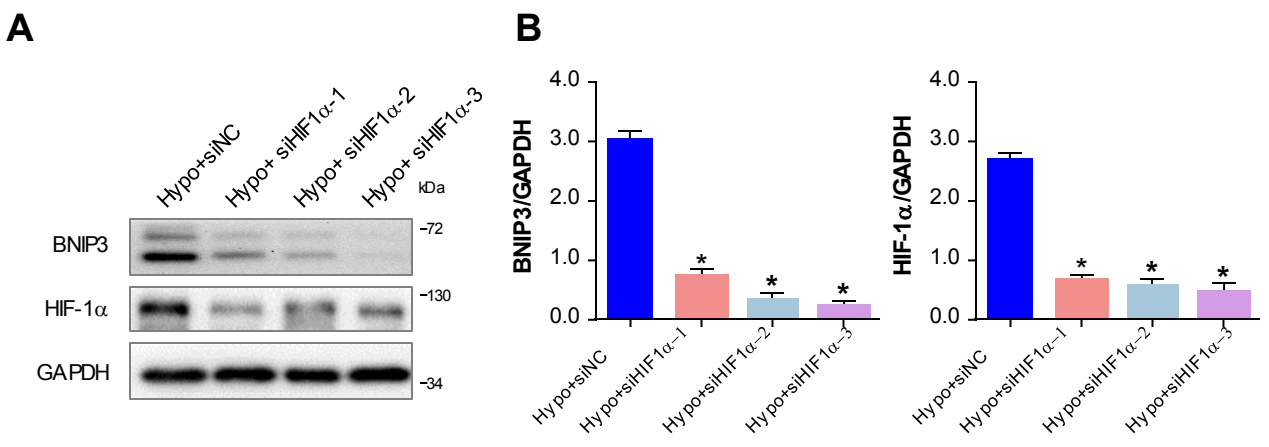

**Supplementary Figure 5**

**A**

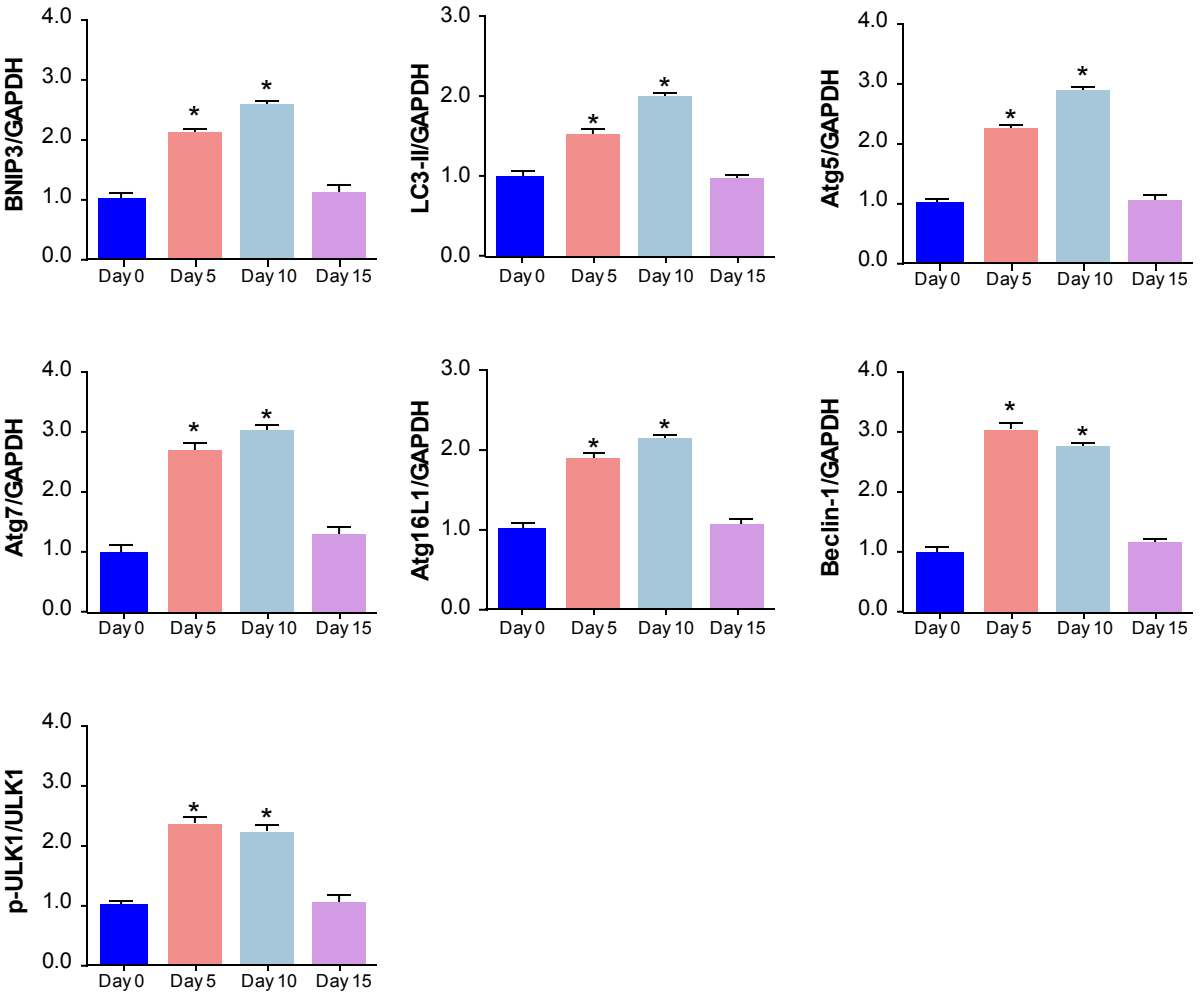

**B**

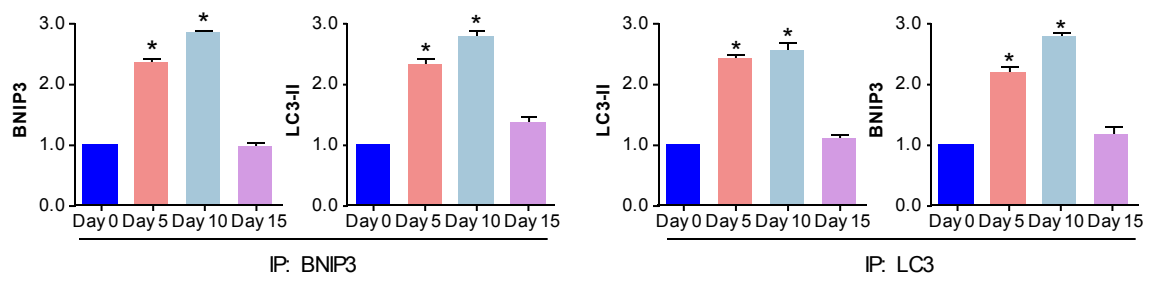

**Supplementary Figure 6**

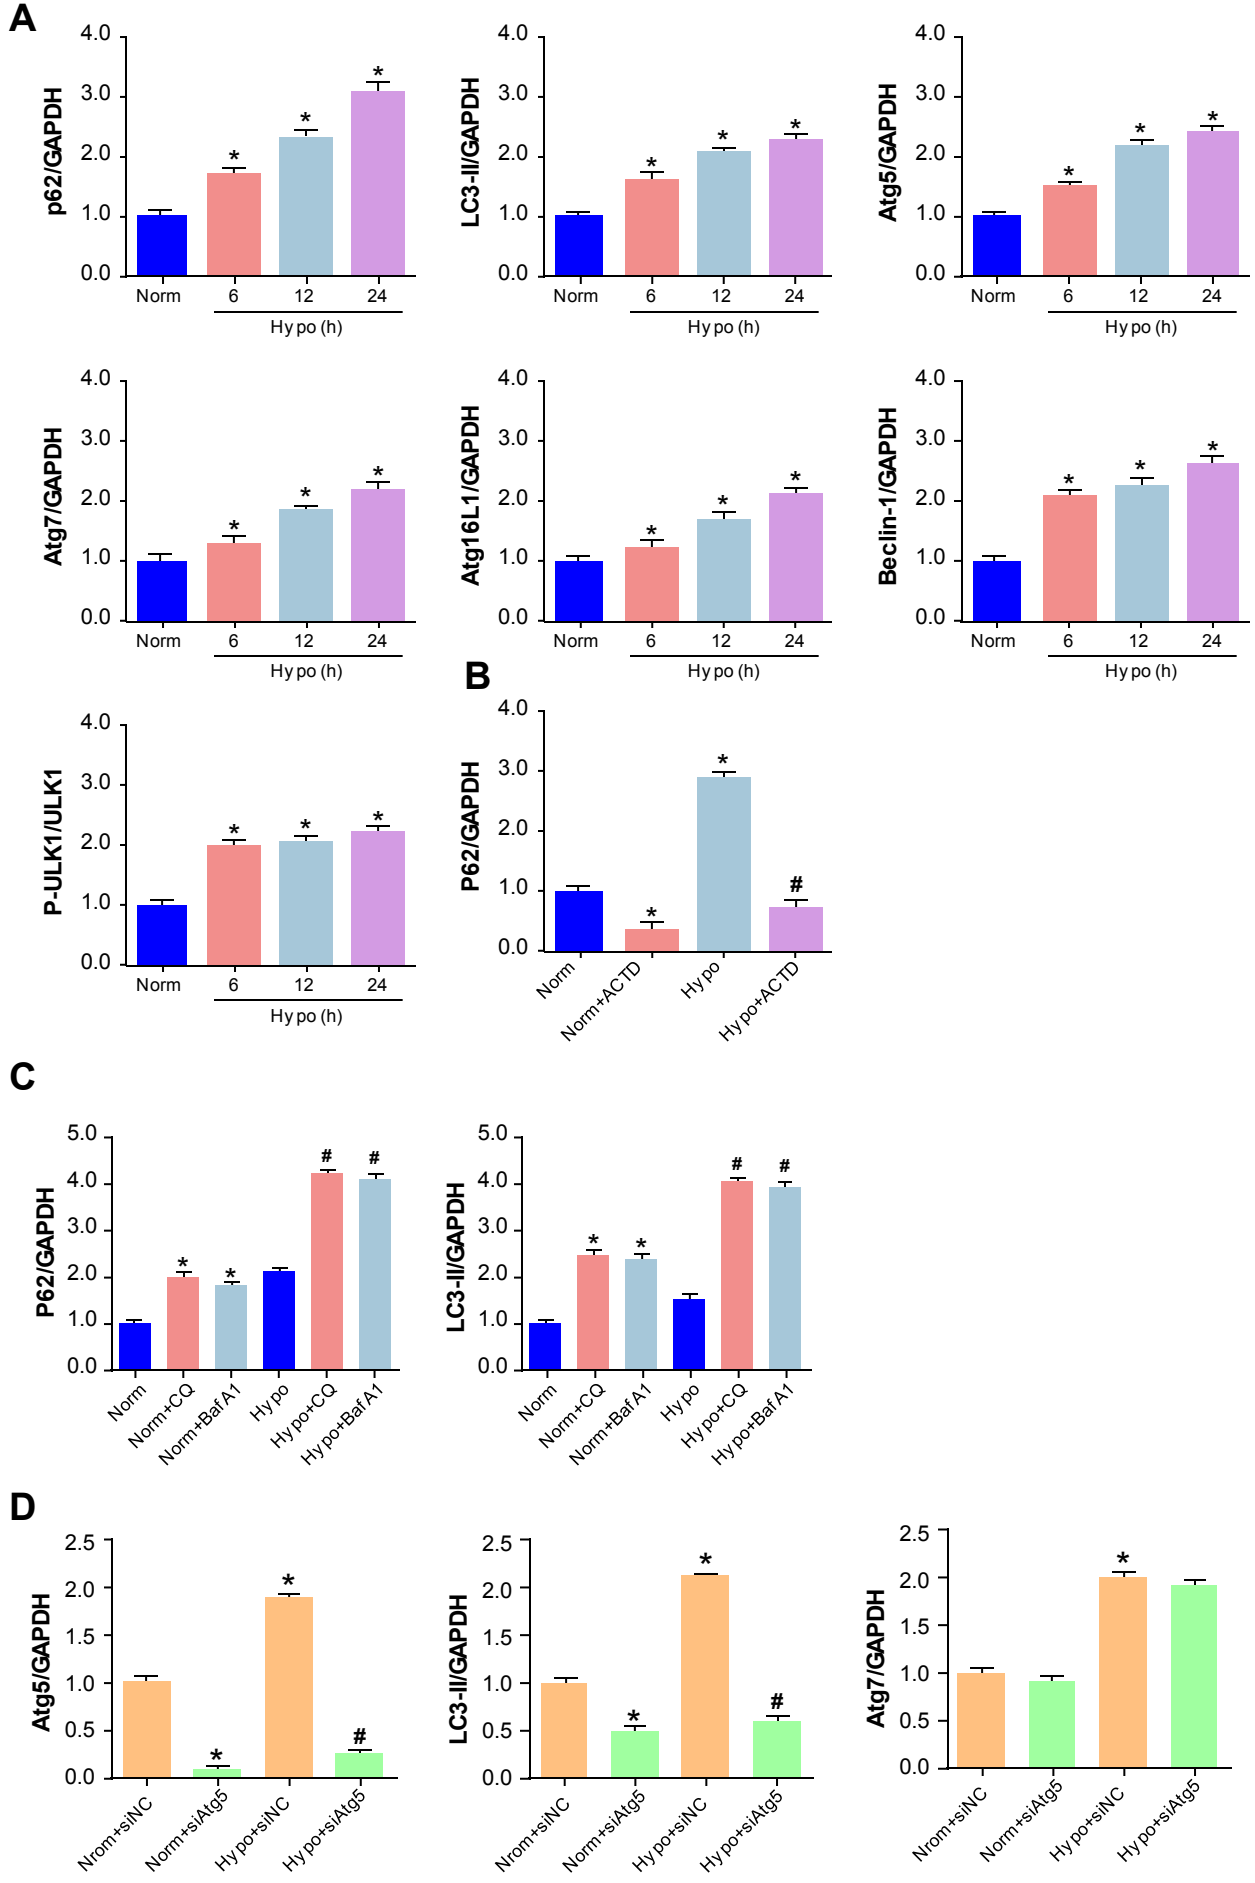

Supplementary Figure 7

**A**

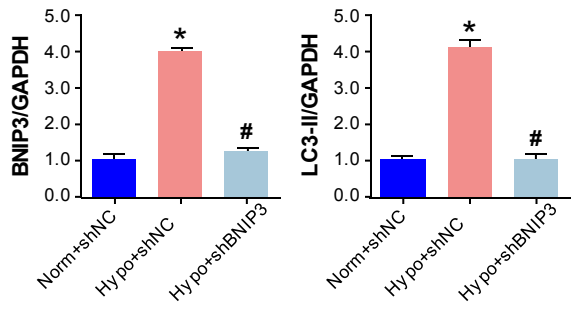

**B**

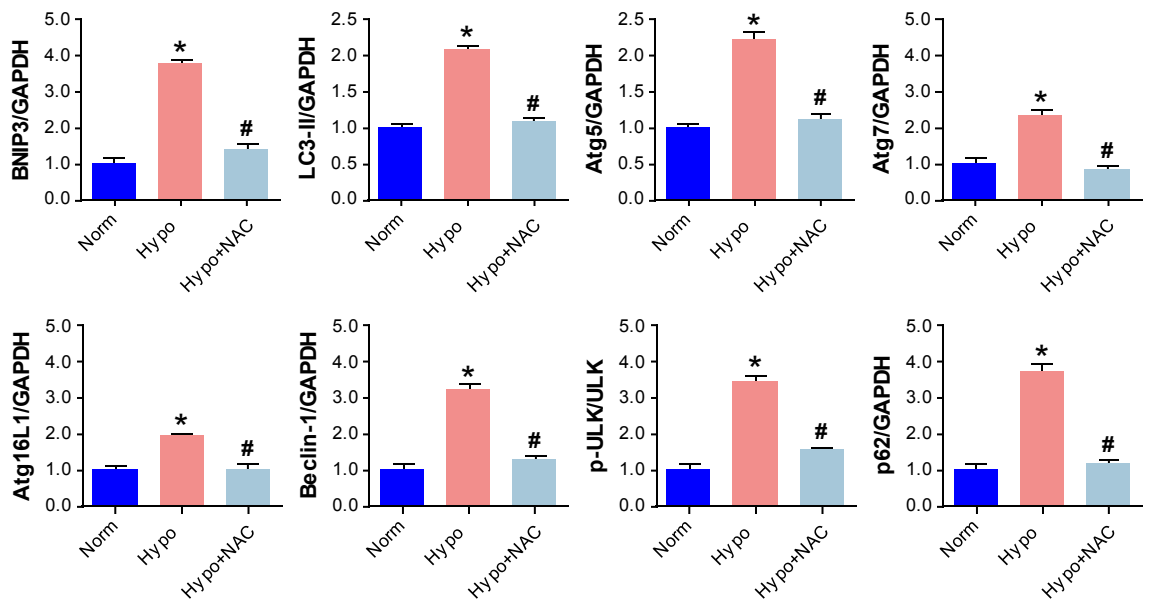

# Supplementary Figure 8

**A**

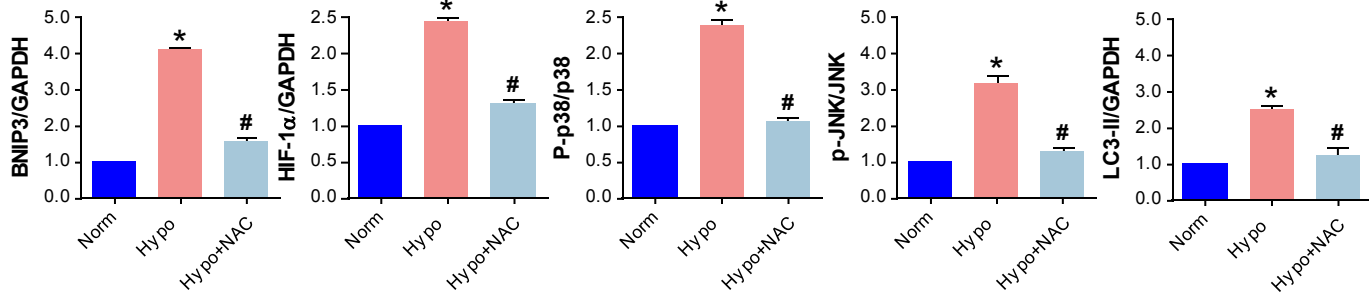

**B**

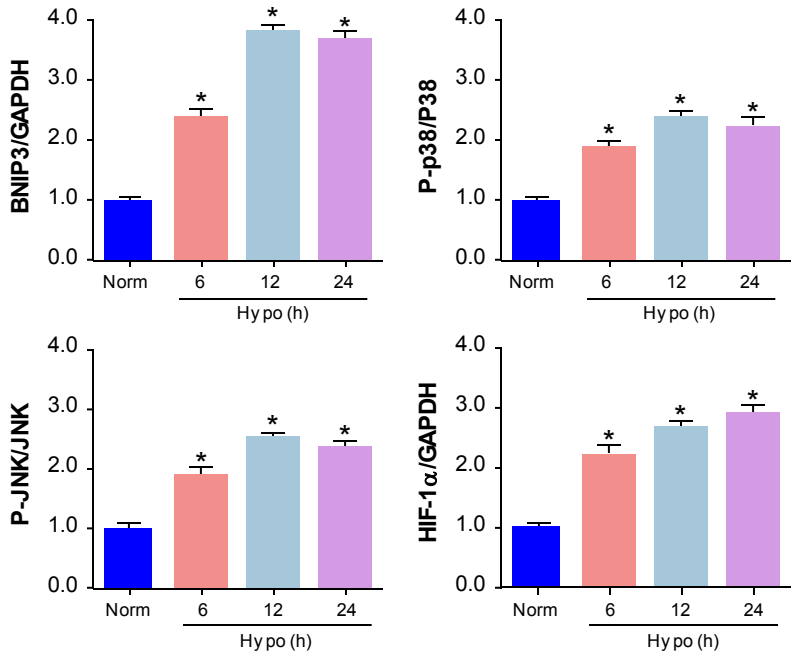

**C**

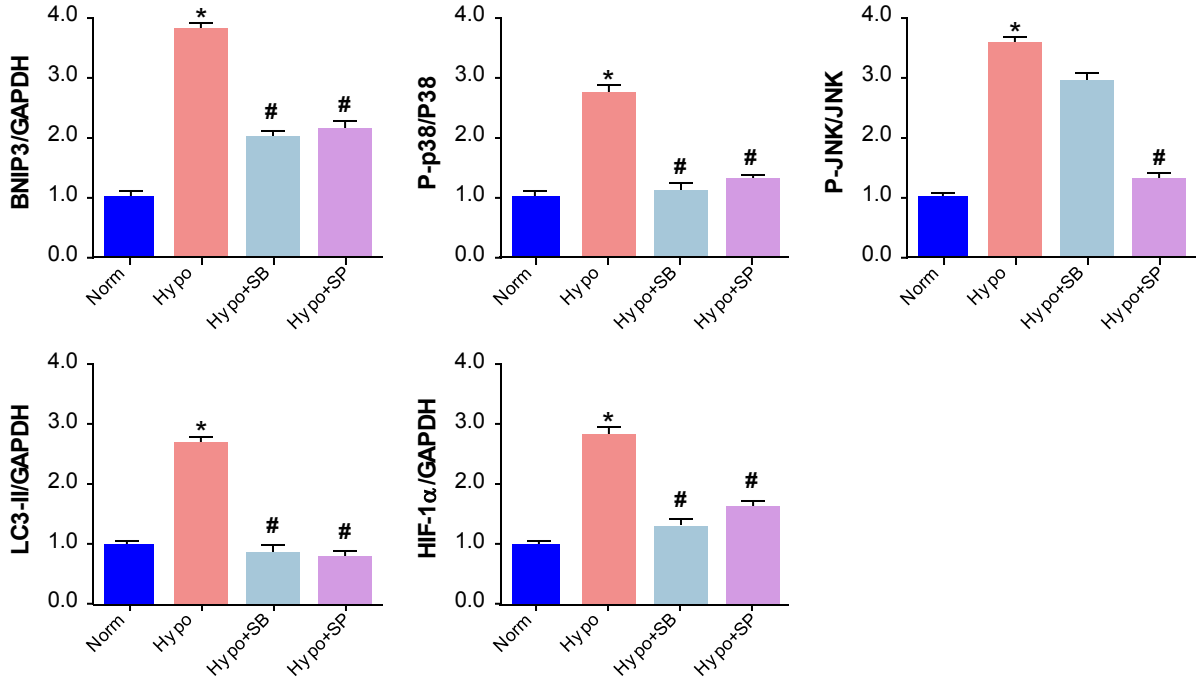

Supplement: 41419_2019_1473_MOESM2_ESM.pdf [file 41419_2019_1473_MOESM2_ESM.pdf]
